# Supplementary material
Source: MDPI journal article supplement (https://www.mdpi.com/2073-4352/12/2/261)
Supplement: s1 [file s1]

# The complete series of lanthanoid-chloranilato lattices with dimethylsulfoxide: Role of the lanthanoid size on the coordination number and crystal structure

Samia Benmansour <sup>1,\*</sup>, Antonio Hernández-Paredes <sup>1</sup> and Carlos J. Gómez-García <sup>1,\*</sup>

<sup>1</sup> Departamento de Química Inorgánica. Universidad de Valencia. C/ Dr. Moliner 50, 46100 Burjasot (Valencia) Spain.

Correspondence: sam.ben@uv.es (S.B.); carlos.gomez@uv.es (C.J.G.-G)

**Table S1.** Crystal size and colour, exact amounts and precursors used for the synthesis of compounds 1-13.

| #  | Formula                                                                                                                      | Salt                                                 | mass (mg) | Aspect       |
|----|------------------------------------------------------------------------------------------------------------------------------|------------------------------------------------------|-----------|--------------|
| 1  | [La <sub>2</sub> (C <sub>6</sub> O <sub>4</sub> Br <sub>2</sub> ) <sub>3</sub> (dmsO) <sub>6</sub> ]                         | La(NO <sub>3</sub> ) <sub>3</sub> ·6H <sub>2</sub> O | 8.8       | Violet block |
| 2  | [Ce <sub>2</sub> (C <sub>6</sub> O <sub>4</sub> Br <sub>2</sub> ) <sub>3</sub> (dmsO) <sub>6</sub> ]                         | Ce(NO <sub>3</sub> ) <sub>3</sub> ·6H <sub>2</sub> O | 8.7       | Red block    |
| 3  | [Pr <sub>2</sub> (C <sub>6</sub> O <sub>4</sub> Br <sub>2</sub> ) <sub>3</sub> (dmsO) <sub>6</sub> ]                         | Pr(NO <sub>3</sub> ) <sub>3</sub> ·6H <sub>2</sub> O | 8.7       | Red prism    |
| 4  | [Nd <sub>2</sub> (C <sub>6</sub> O <sub>4</sub> Br <sub>2</sub> ) <sub>3</sub> (dmsO) <sub>6</sub> ]                         | Nd(NO <sub>3</sub> ) <sub>3</sub> ·6H <sub>2</sub> O | 8.8       | Violet block |
| 5  | [Sm <sub>2</sub> (C <sub>6</sub> O <sub>4</sub> Br <sub>2</sub> ) <sub>3</sub> (dmsO) <sub>6</sub> ]                         | Sm(NO <sub>3</sub> ) <sub>3</sub> ·6H <sub>2</sub> O | 8.9       | Pink prism   |
| 6  | [Eu <sub>2</sub> (C <sub>6</sub> O <sub>4</sub> Br <sub>2</sub> ) <sub>3</sub> (dmsO) <sub>6</sub> ]                         | Eu(NO <sub>3</sub> ) <sub>3</sub> ·6H <sub>2</sub> O | 8.9       | Red block    |
| 7  | [Gd <sub>2</sub> (C <sub>6</sub> O <sub>4</sub> Br <sub>2</sub> ) <sub>3</sub> (dmsO) <sub>6</sub> ]                         | Gd(NO <sub>3</sub> ) <sub>3</sub> ·6H <sub>2</sub> O | 9.0       | Violet prism |
| 8  | [Tb <sub>2</sub> (C <sub>6</sub> O <sub>4</sub> Br <sub>2</sub> ) <sub>3</sub> (dmsO) <sub>6</sub> ]                         | Tb(NO <sub>3</sub> ) <sub>3</sub> ·5H <sub>2</sub> O | 8.7       | Pink block   |
| 9  | [Dy <sub>2</sub> (C <sub>6</sub> O <sub>4</sub> Br <sub>2</sub> ) <sub>3</sub> (dmsO) <sub>4</sub> ]·2dmsO·2H <sub>2</sub> O | Dy(NO <sub>3</sub> ) <sub>3</sub> ·5H <sub>2</sub> O | 8.8       | Pink prism   |
| 10 | [Ho <sub>2</sub> (C <sub>6</sub> O <sub>4</sub> Br <sub>2</sub> ) <sub>3</sub> (dmsO) <sub>4</sub> ]·2dmsO·2H <sub>2</sub> O | Ho(NO <sub>3</sub> ) <sub>3</sub> ·5H <sub>2</sub> O | 8.8       | Pink block   |
| 11 | [Er <sub>2</sub> (C <sub>6</sub> O <sub>4</sub> Br <sub>2</sub> ) <sub>3</sub> (dmsO) <sub>4</sub> ]·2dmsO·2H <sub>2</sub> O | Er(NO <sub>3</sub> ) <sub>3</sub> ·5H <sub>2</sub> O | 8.9       | Violet block |
| 12 | [Tm <sub>2</sub> (C <sub>6</sub> O <sub>4</sub> Br <sub>2</sub> ) <sub>3</sub> (dmsO) <sub>4</sub> ]·2dmsO·2H <sub>2</sub> O | Tm(NO <sub>3</sub> ) <sub>3</sub> ·5H <sub>2</sub> O | 8.9       | Pink prism   |
| 13 | [Yb <sub>2</sub> (C <sub>6</sub> O <sub>4</sub> Br <sub>2</sub> ) <sub>3</sub> (dmsO) <sub>4</sub> ]·2dmsO·2H <sub>2</sub> O | Yb(NO <sub>3</sub> ) <sub>3</sub> ·5H <sub>2</sub> O | 9.0       | Violet prism |

**Table S2.** Crystal data and structure refinement parameters for compounds [Ln<sub>2</sub>(C<sub>6</sub>O<sub>4</sub>Cl<sub>2</sub>)<sub>3</sub>(dmsO)<sub>6</sub>] with Ln = La(**1**), Ce(**2**) and Pr(**3**).

| Compound                                       | [La <sub>2</sub> (C <sub>6</sub> O <sub>4</sub> Cl <sub>2</sub> ) <sub>3</sub> (dmsO) <sub>6</sub> ] | [Ce <sub>2</sub> (C <sub>6</sub> O <sub>4</sub> Cl <sub>2</sub> ) <sub>3</sub> (dmsO) <sub>6</sub> ] | [Pr <sub>2</sub> (C <sub>6</sub> O <sub>4</sub> Cl <sub>2</sub> ) <sub>3</sub> (dmsO) <sub>6</sub> ] |
|------------------------------------------------|------------------------------------------------------------------------------------------------------|------------------------------------------------------------------------------------------------------|------------------------------------------------------------------------------------------------------|
| Ref                                            | <b>1</b>                                                                                             | <b>2</b>                                                                                             | <b>3</b>                                                                                             |
| CCDC                                           | 2142143                                                                                              | 2142144                                                                                              | 2142145                                                                                              |
| Empirical formula                              | C <sub>15</sub> H <sub>6</sub> Cl <sub>3</sub> LaO <sub>9</sub> S <sub>3</sub>                       | C <sub>15</sub> H <sub>6</sub> CeCl <sub>3</sub> O <sub>9</sub> S <sub>3</sub>                       | C <sub>15</sub> H <sub>6</sub> Cl <sub>3</sub> O <sub>9</sub> PrS <sub>3</sub>                       |
| Formula weight                                 | 671.64                                                                                               | 672.85                                                                                               | 673.64                                                                                               |
| Crystal system                                 | monoclinic                                                                                           | monoclinic                                                                                           | monoclinic                                                                                           |
| Space group                                    | <i>P</i> 2 <sub>1</sub> / <i>n</i>                                                                   | <i>P</i> 2 <sub>1</sub> / <i>n</i>                                                                   | <i>P</i> 2 <sub>1</sub> / <i>n</i>                                                                   |
| <i>a</i> (Å)                                   | 9.5575(2)                                                                                            | 9.5998(2)                                                                                            | 9.6249(2)                                                                                            |
| <i>b</i> (Å)                                   | 16.0812(3)                                                                                           | 16.0722(2)                                                                                           | 16.0534(4)                                                                                           |
| <i>c</i> (Å)                                   | 15.4324(3)                                                                                           | 15.4088(3)                                                                                           | 15.3742(3)                                                                                           |
| $\alpha$ (°)                                   | 90                                                                                                   | 90                                                                                                   | 90                                                                                                   |
| $\beta$ (°)                                    | 90.576(2)                                                                                            | 91.128(2)                                                                                            | 91.502(2)                                                                                            |
| $\gamma$ (°)                                   | 90                                                                                                   | 90                                                                                                   | 90                                                                                                   |
| Volume (Å <sup>3</sup> )                       | 2371.78(8)                                                                                           | 2376.96(7)                                                                                           | 2374.69(9)                                                                                           |
| <i>Z</i>                                       | 4                                                                                                    | 4                                                                                                    | 4                                                                                                    |
| Density (calculated)<br>(g/cm <sup>3</sup> )   | 1.881                                                                                                | 1.880                                                                                                | 1.884                                                                                                |
| Absorption<br>coefficient (mm <sup>-1</sup> )  | 2.445                                                                                                | 2.558                                                                                                | 2.695                                                                                                |
| F(000)                                         | 1296.0                                                                                               | 1300.0                                                                                               | 1304.0                                                                                               |
| Crystal size (mm <sup>3</sup> )                | 0.07 × 0.05 × 0.025                                                                                  | 0.080 × 0.060 × 0.020                                                                                | 0.07 × 0.035 × 0.02                                                                                  |
| 2 $\theta$ range for data (°)                  | 5.598 to 50.07                                                                                       | 6.612 to 50.076                                                                                      | 5.55 to 50.098                                                                                       |
| Reflections collected                          | 9756                                                                                                 | 18414                                                                                                | 9387                                                                                                 |
| Data                                           | 4163                                                                                                 | 4197                                                                                                 | 4190                                                                                                 |
| Restraints                                     | 78                                                                                                   | 14                                                                                                   | 36                                                                                                   |
| Parameters                                     | 322                                                                                                  | 307                                                                                                  | 312                                                                                                  |
| Goodness-of-fit on F <sup>2</sup>              | 1.039                                                                                                | 1.041                                                                                                | 1.046                                                                                                |
| R <sub>1</sub> [ <i>I</i> > 2s( <i>I</i> )]    | 0.0412                                                                                               | 0.0394                                                                                               | 0.0409                                                                                               |
| wR <sub>2</sub> (all data)                     | 0.1001                                                                                               | 0.0989                                                                                               | 0.0996                                                                                               |
| Largest diff.<br>peak/hole / e Å <sup>-3</sup> | 1.93/-0.78                                                                                           | 1.572/-0.806                                                                                         | 1.24/-1.08                                                                                           |

**Table S3.** Crystal data and structure refinement parameters for compounds [Ln<sub>2</sub>(C<sub>6</sub>O<sub>4</sub>Cl<sub>2</sub>)<sub>3</sub>(dmsO)<sub>6</sub>] with Ln = Nd(**4**), Sm(**5**) and Eu(**6**).

| Compound                                                    | [Nd <sub>2</sub> (C <sub>6</sub> O <sub>4</sub> Cl <sub>2</sub> ) <sub>3</sub> (dmsO) <sub>6</sub> ] | [Sm <sub>2</sub> (C <sub>6</sub> O <sub>4</sub> Cl <sub>2</sub> ) <sub>3</sub> (dmsO) <sub>6</sub> ] | [Eu <sub>2</sub> (C <sub>6</sub> O <sub>4</sub> Cl <sub>2</sub> ) <sub>3</sub> (dmsO) <sub>6</sub> ] |
|-------------------------------------------------------------|------------------------------------------------------------------------------------------------------|------------------------------------------------------------------------------------------------------|------------------------------------------------------------------------------------------------------|
| Ref                                                         | <b>4</b>                                                                                             | <b>5</b>                                                                                             | <b>6</b>                                                                                             |
| CCDC                                                        | 2142146                                                                                              | 2142147                                                                                              | 2142148                                                                                              |
| Empirical formula                                           | C <sub>15</sub> H <sub>14</sub> Cl <sub>3</sub> NdO <sub>9</sub> S <sub>3</sub>                      | C <sub>15</sub> H <sub>11</sub> Cl <sub>3</sub> O <sub>9</sub> S <sub>3</sub> Sm                     | C <sub>15</sub> H <sub>13</sub> Cl <sub>3</sub> EuO <sub>9</sub> S <sub>3</sub>                      |
| Formula weight                                              | 685.03                                                                                               | 688.12                                                                                               | 691.74                                                                                               |
| Crystal system                                              | monoclinic                                                                                           | monoclinic                                                                                           | monoclinic                                                                                           |
| Space group                                                 | <i>P</i> 2 <sub>1</sub> / <i>n</i>                                                                   | <i>P</i> 2 <sub>1</sub> / <i>n</i>                                                                   | <i>P</i> 2 <sub>1</sub> / <i>n</i>                                                                   |
| <i>a</i> (Å)                                                | 9.63840(10)                                                                                          | 9.6354(4)                                                                                            | 9.6543(2)                                                                                            |
| <i>b</i> (Å)                                                | 16.0436(3)                                                                                           | 15.9723(9)                                                                                           | 15.9914(4)                                                                                           |
| <i>c</i> (Å)                                                | 15.3468(2)                                                                                           | 15.2510(5)                                                                                           | 15.2331(3)                                                                                           |
| $\alpha$ (°)                                                | 90                                                                                                   | 90                                                                                                   | 90                                                                                                   |
| $\beta$ (°)                                                 | 91.915(2)                                                                                            | 92.357(4)                                                                                            | 92.613(2)                                                                                            |
| $\gamma$ (°)                                                | 90                                                                                                   | 90                                                                                                   | 90                                                                                                   |
| Volume (Å <sup>3</sup> )                                    | 2371.82(6)                                                                                           | 2345.14(18)                                                                                          | 2349.33(9)                                                                                           |
| <i>Z</i>                                                    | 4                                                                                                    | 4                                                                                                    | 4                                                                                                    |
| Density (calculated)<br>(g/cm <sup>3</sup> )                | 1.918                                                                                                | 1.949                                                                                                | 1.956                                                                                                |
| Absorption coefficient<br>(mm <sup>-1</sup> )               | 2.834                                                                                                | 3.156                                                                                                | 3.321                                                                                                |
| <i>F</i> (000)                                              | 1340.0                                                                                               | 1336.0                                                                                               | 1348.0                                                                                               |
| Crystal size (mm <sup>3</sup> )                             | 0.1 × 0.06 × 0.05                                                                                    | 0.06 × 0.03 × 0.015                                                                                  | 0.1 × 0.08 × 0.05                                                                                    |
| 2 $\theta$ range for data (°)                               | 6.61 to 50.07                                                                                        | 5.7 to 50.122                                                                                        | 5.704 to 50.07                                                                                       |
| Reflections collected                                       | 8946                                                                                                 | 8755                                                                                                 | 8704                                                                                                 |
| Data                                                        | 4182                                                                                                 | 4103                                                                                                 | 4142                                                                                                 |
| Restraints                                                  | 42                                                                                                   | 51                                                                                                   | 95                                                                                                   |
| Parameters                                                  | 305                                                                                                  | 309                                                                                                  | 310                                                                                                  |
| Goodness-of-fit on <i>F</i> <sup>2</sup>                    | 1.057                                                                                                | 1.039                                                                                                | 1.031                                                                                                |
| <i>R</i> <sub>1</sub> [ <i>I</i> > 2 <i>s</i> ( <i>I</i> )] | 0.0386                                                                                               | 0.0537                                                                                               | 0.0369                                                                                               |
| <i>wR</i> <sub>2</sub> (all data)                           | 0.0911                                                                                               | 0.1188                                                                                               | 0.0847                                                                                               |
| Largest diff.<br>peak/hole / e Å <sup>-3</sup>              | 1.72/-0.65                                                                                           | 1.52/-0.95                                                                                           | 1.72/-0.85                                                                                           |

**Table S4.** Crystal data and structure refinement parameters for compounds [Ln<sub>2</sub>(C<sub>6</sub>O<sub>4</sub>Cl<sub>2</sub>)<sub>3</sub>(dmsO)<sub>6</sub>] with Ln = Gd(**7**) and Tb(**8**).

| Compound                                                    | [Gd <sub>2</sub> (C <sub>6</sub> O <sub>4</sub> Cl <sub>2</sub> ) <sub>3</sub> (dmsO) <sub>6</sub> ] | [Tb <sub>2</sub> (C <sub>6</sub> O <sub>4</sub> Cl <sub>2</sub> ) <sub>3</sub> (dmsO) <sub>6</sub> ] |
|-------------------------------------------------------------|------------------------------------------------------------------------------------------------------|------------------------------------------------------------------------------------------------------|
| Ref                                                         | <b>7</b>                                                                                             | <b>8</b>                                                                                             |
| CCDC                                                        | 2142149                                                                                              | 2142150                                                                                              |
| Empirical formula                                           | C <sub>15</sub> Cl <sub>3</sub> GdO <sub>9</sub> S <sub>3</sub>                                      | C <sub>15</sub> H <sub>9</sub> Cl <sub>3</sub> TbO <sub>9</sub> S <sub>3</sub>                       |
| Formula weight                                              | 683.93                                                                                               | 694.67                                                                                               |
| Crystal system                                              | monoclinic                                                                                           | monoclinic                                                                                           |
| Space group                                                 | <i>P</i> 2 <sub>1</sub> / <i>n</i>                                                                   | <i>P</i> 2 <sub>1</sub> / <i>n</i>                                                                   |
| <i>a</i> (Å)                                                | 9.6382(3)                                                                                            | 9.65790(10)                                                                                          |
| <i>b</i> (Å)                                                | 15.9788(6)                                                                                           | 15.9514(2)                                                                                           |
| <i>c</i> (Å)                                                | 15.1628(5)                                                                                           | 15.1556(2)                                                                                           |
| $\alpha$ (°)                                                | 90                                                                                                   | 90                                                                                                   |
| $\beta$ (°)                                                 | 92.846(3)                                                                                            | 92.8650                                                                                              |
| $\gamma$ (°)                                                | 90                                                                                                   | 90                                                                                                   |
| Volume (Å <sup>3</sup> )                                    | 2332.30(14)                                                                                          | 2331.91(5)                                                                                           |
| <i>Z</i>                                                    | 4                                                                                                    | 4                                                                                                    |
| Density (calculated) (g/cm <sup>3</sup> )                   | 1.948                                                                                                | 1.979                                                                                                |
| Absorption coefficient (mm <sup>-1</sup> )                  | 3.498                                                                                                | 3.688                                                                                                |
| <i>F</i> (000)                                              | 1300.0                                                                                               | 1340.0                                                                                               |
| Crystal size (mm <sup>3</sup> )                             | 0.060 × 0.035 × 0.020                                                                                | 0.050 × 0.040 × 0.020                                                                                |
| 2 $\theta$ range for data (°)                               | 5.726 to 50.142                                                                                      | 6.628 to 50.064                                                                                      |
| Reflections collected                                       | 9385                                                                                                 | 18382                                                                                                |
| Data                                                        | 4111                                                                                                 | 4105                                                                                                 |
| Restraints                                                  | 54                                                                                                   | 12                                                                                                   |
| Parameters                                                  | 300                                                                                                  | 299                                                                                                  |
| Goodness-of-fit on <i>F</i> <sup>2</sup>                    | 1.052                                                                                                | 1.051                                                                                                |
| <i>R</i> <sub>1</sub> [ <i>I</i> > 2 $\sigma$ ( <i>I</i> )] | 0.0460                                                                                               | 0.0309                                                                                               |
| <i>wR</i> <sub>2</sub> (all data)                           | 0.1167                                                                                               | 0.0746                                                                                               |
| Largest diff. peak/hole / e Å <sup>-3</sup>                 | 1.46/-0.87                                                                                           | 1.539/-0.679                                                                                         |

**Table S5.** Crystal data and structure refinement parameters for compounds [Ln<sub>2</sub>(C<sub>6</sub>O<sub>4</sub>Cl<sub>2</sub>)<sub>3</sub>(dmsO)<sub>4</sub>].2dmsO.2H<sub>2</sub>O with Ln = Dy(**9**), Ho (**10**) and Er(**11**).

| Compound                                       | [Dy <sub>2</sub> (C <sub>6</sub> O <sub>4</sub> Cl <sub>2</sub> ) <sub>3</sub> (dmsO) <sub>4</sub> ]<br>·2 dmsO·2H <sub>2</sub> O | [Ho <sub>2</sub> (C <sub>6</sub> O <sub>4</sub> Cl <sub>2</sub> ) <sub>3</sub> (dmsO) <sub>4</sub> ]<br>·2 dmsO·2H <sub>2</sub> O | [Er <sub>2</sub> (C <sub>6</sub> O <sub>4</sub> Cl <sub>2</sub> ) <sub>3</sub> (dmsO) <sub>4</sub> ]<br>·2 dmsO·2H <sub>2</sub> O |
|------------------------------------------------|-----------------------------------------------------------------------------------------------------------------------------------|-----------------------------------------------------------------------------------------------------------------------------------|-----------------------------------------------------------------------------------------------------------------------------------|
| Ref                                            | <b>9*</b>                                                                                                                         | <b>10</b>                                                                                                                         | <b>11*</b>                                                                                                                        |
| CCDC                                           | 2054148                                                                                                                           | 2142151                                                                                                                           | 1586537                                                                                                                           |
| Empirical formula                              | C <sub>15</sub> H <sub>14</sub> Cl <sub>3</sub> DyO <sub>10</sub> S <sub>3</sub>                                                  | C <sub>15</sub> H <sub>12</sub> Cl <sub>3</sub> HoO <sub>10</sub> S <sub>3</sub>                                                  | C <sub>15</sub> H <sub>12</sub> Cl <sub>3</sub> ErO <sub>10</sub> S <sub>3</sub>                                                  |
| Formula weight                                 | 719.29                                                                                                                            | 719.71                                                                                                                            | 722.04                                                                                                                            |
| Crystal system                                 | triclinic                                                                                                                         | triclinic                                                                                                                         | triclinic                                                                                                                         |
| Space group                                    | <i>P</i> -1                                                                                                                       | <i>P</i> -1                                                                                                                       | <i>P</i> -1                                                                                                                       |
| <i>a</i> (Å)                                   | 9.7197(6)                                                                                                                         | 9.7331(4)                                                                                                                         | 9.7277(5)                                                                                                                         |
| <i>b</i> (Å)                                   | 10.6161(7)                                                                                                                        | 10.5508(5)                                                                                                                        | 10.5298(5)                                                                                                                        |
| <i>c</i> (Å)                                   | 12.7564(7)                                                                                                                        | 12.7644(4)                                                                                                                        | 12.7286(6)                                                                                                                        |
| $\alpha$ (°)                                   | 78.913(5)                                                                                                                         | 78.898(3)                                                                                                                         | 78.483(4)                                                                                                                         |
| $\beta$ (°)                                    | 73.305(5)                                                                                                                         | 73.243(3)                                                                                                                         | 73.193(4)                                                                                                                         |
| $\gamma$ (°)                                   | 73.305(5)                                                                                                                         | 84.240(4)                                                                                                                         | 83.957(4)                                                                                                                         |
| Volume (Å <sup>3</sup> )                       | 1235.46(14)                                                                                                                       | 1230.25(9)                                                                                                                        | 1221.41(11)                                                                                                                       |
| <i>Z</i>                                       | 2                                                                                                                                 | 2                                                                                                                                 | 2                                                                                                                                 |
| Density (calculated)<br>(g/cm <sup>3</sup> )   | 1.934                                                                                                                             | 1.943                                                                                                                             | 1.963                                                                                                                             |
| Absorption<br>coefficient (mm <sup>-1</sup> )  | 3.648                                                                                                                             | 3.842                                                                                                                             | 4.067                                                                                                                             |
| F(000)                                         | 698.0                                                                                                                             | 696.0                                                                                                                             | 698.0                                                                                                                             |
| Crystal size (mm <sup>3</sup> )                | 0.140 × 0.120 × 0.020                                                                                                             | 0.06 × 0.05 × 0.02                                                                                                                | 0.130 × 0.110 × 0.020                                                                                                             |
| 2 $\theta$ range for data (°)                  | 6.652 to 50.066                                                                                                                   | 6.648 to 50.082                                                                                                                   | 6.796 to 50.062                                                                                                                   |
| Reflections collected                          | 8103                                                                                                                              | 15449                                                                                                                             | 8041                                                                                                                              |
| Data                                           | 4372                                                                                                                              | 4362                                                                                                                              | 4321                                                                                                                              |
| Restraints                                     | 6                                                                                                                                 | 120                                                                                                                               | 30                                                                                                                                |
| Parameters                                     | 301                                                                                                                               | 316                                                                                                                               | 303                                                                                                                               |
| Goodness-of-fit on<br>F <sup>2</sup>           | 1.116                                                                                                                             | 1.064                                                                                                                             | 1.048                                                                                                                             |
| R <sub>1</sub> [ <i>I</i> > 2s( <i>I</i> )]    | 0.0520                                                                                                                            | 0.0405                                                                                                                            | 0.0402                                                                                                                            |
| wR <sub>2</sub> (all data)                     | 0.1248                                                                                                                            | 0.1027                                                                                                                            | 0.0940                                                                                                                            |
| Largest diff.<br>peak/hole / e Å <sup>-3</sup> | 1.652/-1.549                                                                                                                      | 1.39/-1.83                                                                                                                        | 1.684/ -1.230                                                                                                                     |

\* Data published, see references [1, 2].

**Table S6.** Crystal data and structure refinement parameters for compounds [Ln<sub>2</sub>(C<sub>6</sub>O<sub>4</sub>Cl<sub>2</sub>)<sub>3</sub>(dmsO)<sub>4</sub>] $\cdot$ 2dmsO $\cdot$ 2H<sub>2</sub>O with Ln = Tm(**12**) and Yb(**13**).

| Compound                                             | [Tm <sub>2</sub> (C <sub>6</sub> O <sub>4</sub> Cl <sub>2</sub> ) <sub>3</sub> (dmsO) <sub>4</sub> ]<br>$\cdot$ 2 dmsO $\cdot$ 2H <sub>2</sub> O | [Yb <sub>2</sub> (C <sub>6</sub> O <sub>4</sub> Cl <sub>2</sub> ) <sub>3</sub> (dmsO) <sub>4</sub> ]<br>$\cdot$ 2 dmsO $\cdot$ 2H <sub>2</sub> O |
|------------------------------------------------------|--------------------------------------------------------------------------------------------------------------------------------------------------|--------------------------------------------------------------------------------------------------------------------------------------------------|
| Ref                                                  | <b>12</b>                                                                                                                                        | <b>13</b>                                                                                                                                        |
| CCDC                                                 | 2142152                                                                                                                                          | 2142153                                                                                                                                          |
| Empirical formula                                    | C <sub>15</sub> H <sub>18</sub> Cl <sub>3</sub> O <sub>10</sub> S <sub>3</sub> Tm                                                                | C <sub>15</sub> H <sub>18</sub> Cl <sub>3</sub> O <sub>10</sub> S <sub>3</sub> Yb                                                                |
| Formula weight                                       | 729.75                                                                                                                                           | 732.85                                                                                                                                           |
| Crystal system                                       | triclinic                                                                                                                                        | triclinic                                                                                                                                        |
| Space group                                          | <i>P</i> -1                                                                                                                                      | <i>P</i> -1                                                                                                                                      |
| <i>a</i> (Å)                                         | 9.7002(8)                                                                                                                                        | 9.7123(4)                                                                                                                                        |
| <i>b</i> (Å)                                         | 10.5192(10)                                                                                                                                      | 10.4665(5)                                                                                                                                       |
| <i>c</i> (Å)                                         | 12.6581(12)                                                                                                                                      | 12.7036(7)                                                                                                                                       |
| $\alpha$ (°)                                         | 78.450(8)                                                                                                                                        | 78.599(4)                                                                                                                                        |
| $\beta$ (°)                                          | 73.099(8)                                                                                                                                        | 73.267(4)                                                                                                                                        |
| $\gamma$ (°)                                         | 83.863(7)                                                                                                                                        | 84.330(4)                                                                                                                                        |
| Volume (Å <sup>3</sup> )                             | 1209.2(2)                                                                                                                                        | 1211.08(11)                                                                                                                                      |
| <i>Z</i>                                             | 2                                                                                                                                                | 2                                                                                                                                                |
| Density (calculated) (g/cm <sup>3</sup> )            | 2.004                                                                                                                                            | 2.010                                                                                                                                            |
| Absorption coefficient (mm <sup>-1</sup> )           | 4.307                                                                                                                                            | 4.498                                                                                                                                            |
| F(000)                                               | 712.0                                                                                                                                            | 712.0                                                                                                                                            |
| Crystal size (mm <sup>3</sup> )                      | 0.09 $\times$ 0.06 $\times$ 0.02                                                                                                                 | 0.130 $\times$ 0.060 $\times$ 0.030                                                                                                              |
| 2 $\theta$ range for data (°)                        | 6.708 to 50.088                                                                                                                                  | 6.690 to 50.092                                                                                                                                  |
| Reflections collected                                | 8462                                                                                                                                             | 7722                                                                                                                                             |
| Data                                                 | 4264                                                                                                                                             | 4278                                                                                                                                             |
| Restraints                                           | 50                                                                                                                                               | 0                                                                                                                                                |
| Parameters                                           | 289                                                                                                                                              | 293                                                                                                                                              |
| Goodness-of-fit on F <sup>2</sup>                    | 1.046                                                                                                                                            | 1.187                                                                                                                                            |
| R <sub>1</sub> [ <i>I</i> > 2 $\sigma$ ( <i>I</i> )] | 0.0696                                                                                                                                           | 0.0383                                                                                                                                           |
| wR <sub>2</sub> (all data)                           | 0.2012                                                                                                                                           | 0.0845                                                                                                                                           |
| Largest diff.<br>peak/hole / e Å <sup>-3</sup>       | 4.37/-2.40                                                                                                                                       | 2.391/-1.616                                                                                                                                     |

**Table S7.** Continuous SHAPE measurement (CShM) values of the 13 possible coordination geometries for the Ln(III) ion with coordination number nine in compounds **1-8**. The minimum values are indicated in bold.

| Geometry       | Symmetry   | 1            | 2            | 3            | 4            | 5            | 6            | 7            | 8            |
|----------------|------------|--------------|--------------|--------------|--------------|--------------|--------------|--------------|--------------|
| EP-9           | D9h        | 36.422       | 36.538       | 36.556       | 36.737       | 36.812       | 36.830       | 36.712       | 36.849       |
| OPY-9          | C8v        | 23.269       | 23.091       | 23.109       | 22.834       | 22.798       | 22.713       | 22.815       | 22.674       |
| HBPY-9         | D7h        | 18.832       | 18.845       | 18.851       | 18.783       | 19.004       | 18.973       | 19.116       | 19.152       |
| JTC-9          | C3v        | 16.088       | 16.104       | 16.088       | 16.035       | 16.143       | 16.201       | 16.208       | 16.240       |
| JCCU-9         | C4v        | 10.777       | 10.817       | 10.919       | 10.929       | 10.828       | 10.846       | 10.762       | 10.713       |
| CCU-9          | C4v        | 9.563        | 9.632        | 9.738        | 9.744        | 9.858        | 9.878        | 9.805        | 9.776        |
| JCSAPR-9       | C4v        | 1.724        | 1.575        | 1.496        | 1.405        | 1.287        | 1.272        | 1.223        | 1.186        |
| <b>CSAPR-9</b> | <b>C4v</b> | <b>0.776</b> | <b>0.664</b> | <b>0.602</b> | <b>0.531</b> | <b>0.434</b> | <b>0.426</b> | <b>0.383</b> | <b>0.369</b> |
| JTCTPR-9       | D3h        | 2.916        | 2.877        | 2.853        | 2.835        | 2.720        | 2.706        | 2.625        | 2.613        |
| TCTPR-9        | D3h        | 1.361        | 1.426        | 1.424        | 1.394        | 1.275        | 1.288        | 1.218        | 1.210        |
| JTDIC-9        | C3v        | 11.980       | 12.282       | 12.422       | 12.491       | 12.508       | 12.603       | 12.617       | 12.612       |
| HH-9           | C2v        | 10.726       | 10.832       | 10.879       | 11.000       | 11.299       | 11.250       | 11.512       | 11.459       |
| MFF-9          | Cs         | 0.852        | 0.799        | 0.772        | 0.749        | 0.732        | 0.706        | 0.726        | 0.705        |

EP-9 = Enneagon; OPY-9 = Octagonal pyramid; HBPY-9 = Heptagonal bipyramid; JTC-9 = Triangular cupola (J3) = trivacant cuboctahedron; JCCU-9 = Capped cube (Elongated square pyramid, J8); CCU-9 = Capped cube; JCSAPR-9 = Capped square antiprism (Gyroelongated square pyramid J10); **CSAPR-9 = Capped square antiprism**; JTCTPR-9 = Tricapped trigonal prism (J51); TCTPR-9 = Tricapped trigonal prism; JTDIC-9 = Tridiminished icosahedron (J63); HH-9 = Hula-hoop; MFF-9 = Muffin.

**Table S8.** Continuous SHAPE measurement (CShM) values of the 13 possible coordination geometries for the Ln(III) ion with coordination number eight in compounds **9-13**. The minimum values are indicated in bold.

| Geometry     | Symmetry   | 9            | 10           | 11           | 12           | 13           |
|--------------|------------|--------------|--------------|--------------|--------------|--------------|
| OP-8         | D8h        | 30.366       | 30.377       | 30.399       | 30.229       | 30.471       |
| HPY-8        | C7v        | 23.156       | 23.291       | 23.426       | 23.348       | 23.431       |
| HBPY-8       | D6h        | 15.039       | 15.112       | 15.034       | 15.025       | 15.027       |
| CU-8         | Oh         | 11.281       | 11.356       | 11.281       | 11.224       | 11.253       |
| SAPR-8       | D4d        | 1.603        | 1.586        | 1.602        | 1.556        | 1.559        |
| <b>TDD-8</b> | <b>D2d</b> | <b>1.208</b> | <b>1.149</b> | <b>1.126</b> | <b>1.142</b> | <b>1.062</b> |
| JGBF-8       | D2d        | 13.161       | 13.081       | 12.920       | 12.995       | 12.947       |
| JETBPY-8     | D3h        | 28.647       | 28.825       | 28.806       | 28.831       | 28.914       |
| JBTPR-8      | C2v        | 2.267        | 2.271        | 2.246        | 2.324        | 2.242        |
| BTPR-8       | C2v        | 1.806        | 1.817        | 1.814        | 1.865        | 1.790        |
| JSD-8        | D2d        | 3.079        | 2.996        | 2.929        | 3.012        | 2.898        |
| TT-8         | Td         | 12.011       | 12.092       | 12.031       | 11.926       | 12.002       |
| ETBPY-8      | D3h        | 23.622       | 23.753       | 24.080       | 24.073       | 24.345       |

OP-8 = Octagon; HPY-8 = Heptagonal pyramid; HBPY-8 = Hexagonal bipyramid; CU-8 = Cube; SAPR-8 = Square antiprism; **TDD-8 = Triangular dodecahedron**; JGBF-8 = Johnson-Gyrobifastigium (J26); JETBPY-8 = Johnson-Elongated triangular bipyramid (J14); JBTP-8 = Johnson-Biaugmented trigonal prism (J50); BTPR-8 = Biaugmented trigonal prism; JSD-8 = Snub disphenoid (J84); TT-8 = Triakis tetrahedron.

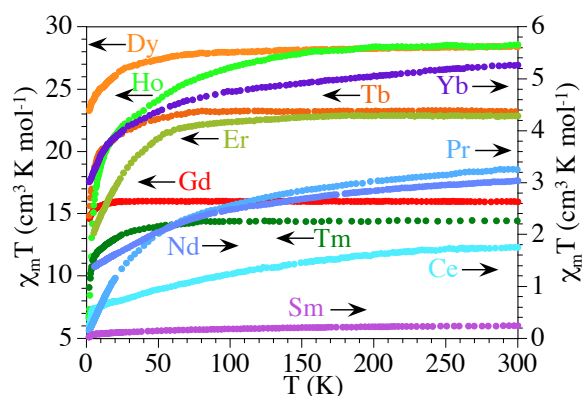

**Figure S1.** Thermal variation of the  $\chi_m T$  product per formula unit (two Ln(III) ions) for compounds **1-13**.

**Table S9.** Experimental and calculated room temperature  $\chi_m T$  values for compounds **1-13**.

| #  | Ln <sup>3+</sup> | Ground State                   | $\chi_m T_{\text{calc.}}$ (cm <sup>3</sup> K mol <sup>-1</sup> ) | $\chi_m T_{\text{exp}}$ (cm <sup>3</sup> K mol <sup>-1</sup> ) |
|----|------------------|--------------------------------|------------------------------------------------------------------|----------------------------------------------------------------|
| 1  | La <sup>3+</sup> | <sup>1</sup> F <sub>0</sub>    | 0                                                                | -                                                              |
| 2  | Ce <sup>3+</sup> | <sup>5</sup> F <sub>5/2</sub>  | 1.60                                                             | 1.8                                                            |
| 3  | Pr <sup>3+</sup> | <sup>3</sup> H <sub>4</sub>    | 3.20                                                             | 3.2                                                            |
| 4  | Nd <sup>3+</sup> | <sup>4</sup> I <sub>9/2</sub>  | 3.28                                                             | 3.1                                                            |
| 5  | Sm <sup>3+</sup> | <sup>6</sup> H <sub>5/2</sub>  | 0.18                                                             | 0.2                                                            |
| 6  | Eu <sup>3+</sup> | <sup>7</sup> F <sub>0</sub>    | 0                                                                | -                                                              |
| 7  | Gd <sup>3+</sup> | <sup>8</sup> S <sub>7/2</sub>  | 15.76                                                            | 15.9                                                           |
| 8  | Tb <sup>3+</sup> | <sup>7</sup> F <sub>6</sub>    | 23.64                                                            | 23.3                                                           |
| 9  | Dy <sup>3+</sup> | <sup>6</sup> H <sub>15/2</sub> | 28.40                                                            | 28.0                                                           |
| 10 | Ho <sup>3+</sup> | <sup>5</sup> I <sub>8</sub>    | 28.10                                                            | 28.0                                                           |
| 11 | Er <sup>3+</sup> | <sup>4</sup> I <sub>15/2</sub> | 22.96                                                            | 22.8                                                           |
| 12 | Tm <sup>3+</sup> | <sup>3</sup> H <sub>6</sub>    | 14.30                                                            | 14.4                                                           |
| 13 | Yb <sup>3+</sup> | <sup>2</sup> F <sub>7/2</sub>  | 5.14                                                             | 5.3                                                            |

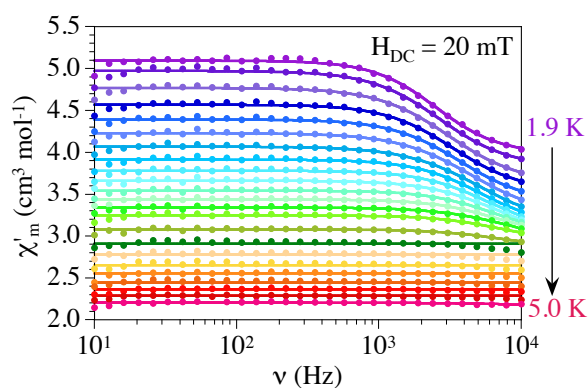

**Figure S2.** Frequency dependence of  $\chi'_m$  for compound **11** with  $H_{dc} = 20$  mT in the temperature range 1.9-5.0 K. Solid lines are the best fit to the Debye model.



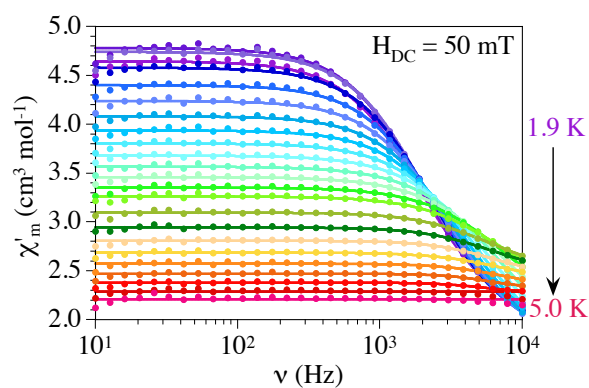

**Figure S3.** Frequency dependence of  $\chi'_m$  for compound **11** with  $H_{dc} = 50$  mT in the temperature range 1.9-5.0 K. Solid lines are the best fit to the Debye model.

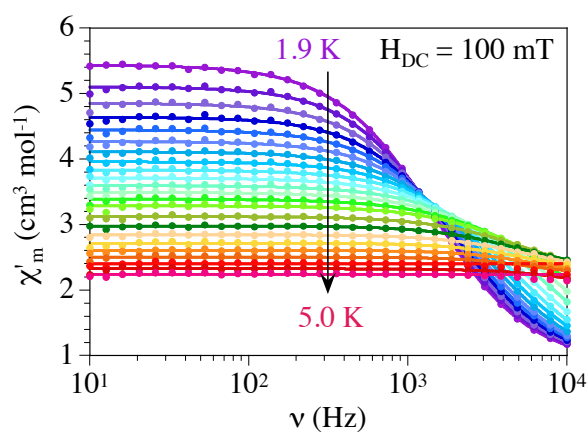

**Figure S4.** Frequency dependence of  $\chi'_m$  for compound **11** with  $H_{dc} = 100$  mT in the temperature range 1.9-5.0 K. Solid lines are the best fit to the Debye model.

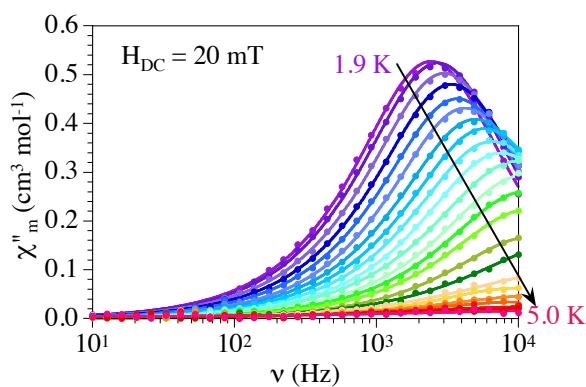

**Figure S5.** Frequency dependence of  $\chi''_m$  for compound **11** with  $H_{dc} = 20$  mT in the temperature range 1.9-5.0 K. Solid lines are the best fit to the Debye model.

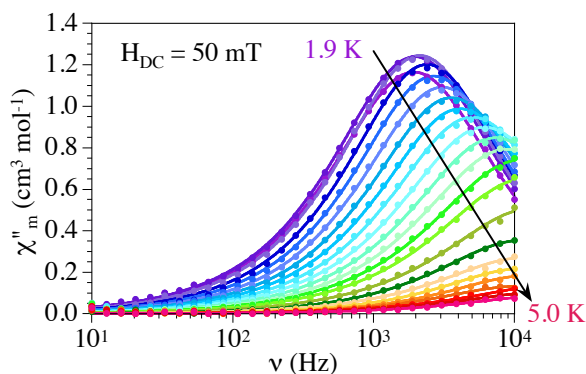

**Figure S6.** Frequency dependence of  $\chi''_m$  for compound **11** with  $H_{dc} = 50$  mT in the temperature range 1.9-5.0 K. Solid lines are the best fit to the Debye model.

**Table S10.** Ln-O bond distances (in Å) in compounds **1-8**.

| Distance                             | 1 (La)   | 2 (Ce)   | 3 (Pr)   | 4 (Nd)   | 5 (Sm)   | 6 (Eu)   | 7 (Gd)   | 8 (Tb)   |
|--------------------------------------|----------|----------|----------|----------|----------|----------|----------|----------|
| Ln-O2                                | 2.569(3) | 2.543(4) | 2.546(4) | 2.523(4) | 2.515(5) | 2.515(4) | 2.456(4) | 2.451(3) |
| Ln-O3                                | 2.587(4) | 2.558(4) | 2.533(4) | 2.524(4) | 2.487(5) | 2.476(4) | 2.497(5) | 2.459(3) |
| Ln-O5                                | 2.602(3) | 2.567(4) | 2.550(4) | 2.544(4) | 2.498(5) | 2.489(4) | 2.458(4) | 2.501(3) |
| Ln-O6                                | 2.579(4) | 2.569(4) | 2.545(4) | 2.520(3) | 2.497(5) | 2.478(4) | 2.475(4) | 2.446(3) |
| Ln-O12                               | 2.539(4) | 2.523(4) | 2.511(4) | 2.492(3) | 2.478(6) | 2.461(4) | 2.451(4) | 2.435(3) |
| Ln-O16                               | 2.557(4) | 2.539(4) | 2.523(4) | 2.506(4) | 2.477(6) | 2.473(4) | 2.454(6) | 2.452(3) |
| Ln-O1D                               | 2.487(4) | 2.467(4) | 2.412(4) | 2.441(4) | 2.364(6) | 2.388(4) | 2.362(5) | 2.380(3) |
| Ln-O11D                              | 2.479(4) | 2.460(4) | 2.449(4) | 2.429(4) | 2.397(7) | 2.363(4) | 2.359(5) | 2.358(4) |
| Ln-O21D                              | 2.453(4) | 2.426(4) | 2.446(4) | 2.394(4) | 2.407(6) | 2.405(4) | 2.386(5) | 2.345(3) |
| Ln-O <sub>anilato</sub> <sup>1</sup> | 2.572    | 2.550    | 2.535    | 2.518    | 2.489    | 2.482    | 2.465    | 2.457    |
| Ln-O <sub>dmsO</sub> <sup>2</sup>    | 2.473    | 2.451    | 2.436    | 2.421    | 2.389    | 2.385    | 2.369    | 2.361    |

<sup>1</sup> Average Ln-O bond distance of the anilato oxygen atoms: O2, O3, O12, O13, O22 and O23 (O13, O22 and O23 correspond to O16, O6 and O5, respectively, in **2**, **4** and **8**).

<sup>2</sup> Average Ln-O bond distance of the dmso oxygen atoms (O1D, O11D and O21D).

**Table S11.** Ln-O bond distances (in Å) in compounds **9-13**.

| Compound                             | 9 (Dy)   | 10 (Ho)  | 11 (Er)  | 12 (Tm)  | 13 (Yb)  |
|--------------------------------------|----------|----------|----------|----------|----------|
| Ln-O2                                | 2.374(5) | 2.357(5) | 2.364(4) | 2.351(8) | 2.333(4) |
| Ln-O3*                               | 2.382(6) | 2.375(5) | 2.349(4) | 2.366(8) | 2.357(4) |
| Ln-O12                               | 2.380(6) | 2.366(4) | 2.355(4) | 2.343(9) | 2.324(4) |
| Ln-O13*                              | 2.398(6) | 2.389(4) | 2.377(4) | 2.348(9) | 2.348(4) |
| Ln-O22                               | 2.375(5) | 2.354(5) | 2.342(4) | 2.342(8) | 2.329(4) |
| Ln-O23*                              | 2.393(6) | 2.376(5) | 2.371(4) | 2.348(9) | 2.348(4) |
| Ln-O1D                               | 2.319(6) | 2.305(4) | 2.298(5) | 2.278(7) | 2.248(4) |
| Ln-O11D                              | 2.293(6) | 2.275(5) | 2.260(5) | 2.280(8) | 2.283(4) |
| Ln-O <sub>anilato</sub> <sup>1</sup> | 2.384    | 2.370    | 2.360    | 2.350    | 2.340    |
| Ln-O <sub>dmsO</sub> <sup>2</sup>    | 2.306    | 2.290    | 2.279    | 2.279    | 2.266    |

<sup>1</sup> Average Ln-O bond distance of the anilato oxygen atoms: O2, O3, O12, O13, O22 and O23 (O3, O13 and O23 correspond to O6, O16 and O26, respectively, in **11**).

<sup>2</sup> Average Ln-O bond distance of the dmso oxygen atoms (O1D and O11D).

**Table S12.** Ln-Ln distances (Å) along the three diagonals and Ln-Ln-Ln angles (°) in the hexagonal rings in **1-13**.

| #  | Ln (III) | Phase | d <sub>1</sub> (Å) | d <sub>2</sub> (Å) | d <sub>3</sub> (Å) | α <sub>1</sub> (°) | α <sub>2</sub> (°) | α <sub>3</sub> (°) | Σ d <sub>1</sub> - d <sub>av</sub>   (Å) | Σ 120 - α <sub>i</sub>   (°) |
|----|----------|-------|--------------------|--------------------|--------------------|--------------------|--------------------|--------------------|------------------------------------------|------------------------------|
| 1  | La       | I     | 20.84              | 19.51              | 10.80              | 90.72              | 100.16             | 165.91             | 12.50                                    | 95.03                        |
| 2  | Ce       | I     | 20.74              | 19.43              | 10.73              | 90.69              | 100.08             | 166.15             | 12.47                                    | 95.38                        |
| 3  | Pr       | I     | 20.65              | 19.36              | 10.71              | 90.81              | 100.07             | 166.04             | 12.39                                    | 95.15                        |
| 4  | Nd       | I     | 20.57              | 19.29              | 10.66              | 90.80              | 100.02             | 166.18             | 12.36                                    | 95.35                        |
| 5  | Sm       | I     | 20.38              | 19.15              | 10.63              | 91.13              | 99.99              | 165.79             | 12.18                                    | 94.67                        |
| 6  | Eu       | I     | 20.33              | 19.13              | 10.61              | 91.20              | 99.88              | 165.88             | 12.16                                    | 94.80                        |
| 7  | Gd       | I     | 20.20              | 19.05              | 10.62              | 91.52              | 99.86              | 165.48             | 12.01                                    | 94.10                        |
| 8  | Tb       | I     | 20.18              | 19.05              | 10.58              | 91.51              | 99.74              | 165.68             | 12.05                                    | 94.43                        |
| 9  | Dy       | II    | 20.25              | 16.61              | 14.12              | 94.87              | 122.36             | 141.78             | 6.51                                     | 49.26                        |
| 10 | Ho       | II    | 20.12              | 16.60              | 14.09              | 95.37              | 121.94             | 141.66             | 6.37                                     | 48.23                        |
| 11 | Er       | II    | 20.08              | 16.49              | 14.14              | 95.35              | 122.61             | 141.00             | 6.35                                     | 48.26                        |
| 12 | Tm       | II    | 20.05              | 16.37              | 14.12              | 95.09              | 123.17             | 140.78             | 6.41                                     | 48.86                        |
| 13 | Yb       | II    | 19.95              | 16.47              | 14.07              | 95.66              | 122.23             | 141.15             | 6.24                                     | 47.72                        |

## References

1. Benmansour, S.; Pérez-Herráez, I.; Cerezo-Navarrete, C.; López-Martínez, G.; Martínez Hernandez, C.; Gómez-García, C. J. Solvent-Modulation of the Structure and Dimensionality in Lanthanoid-Anilato Coordination Polymers. *Dalton Trans.* **2018**, 47, 6729-6741.
2. Benmansour, S.; Hernández-Paredes, A.; Bayona-Andrés, M.; Gómez-García, C. J. Slow Relaxation of the Magnetization in Anilato-Based Dy(III) 2D Lattices. *Molecules* **2021**, 26.
